# Supplementary material
Source: publisher figshare collection journal article supplement (https://sage.figshare.com/ndownloader/files/16639019)
Supplement: Supplementary file 1 [file 16639019]

Table S1. Reaction model types and corresponding reaction equations  $de/dt = -A \exp(E/RT)f(e, p)$  of Netzsch Thermokinetics software [1]

| Code      | $f(e, p)$                   | Reaction type                                                                                                                  |
|-----------|-----------------------------|--------------------------------------------------------------------------------------------------------------------------------|
| $F_1$     | $e$                         | First-order reaction                                                                                                           |
| $F_2$     | $e^2$                       | Second-order reaction                                                                                                          |
| $F_n$     | $e^n$                       | $n^{\text{th}}$ -order reaction                                                                                                |
| $R_2$     | $2e^{1/2}$                  | Two-dimensional phase boundary reaction                                                                                        |
| $R_3$     | $3e^{2/3}$                  | Three-dimensional phase boundary reaction                                                                                      |
| $D_1$     | $0.5/(1 - e)$               | One-dimensional diffusion                                                                                                      |
| $D_2$     | $-1/\ln(e)$                 | Two-dimensional diffusion                                                                                                      |
| $D_3$     | $1.5e^{1/3}/(e^{-1/3} - 1)$ | Three-dimensional diffusion (Jander's type)                                                                                    |
| $D_4$     | $1.5/(e^{-1/3} - 1)$        | Three-dimensional diffusion (Ginstling–Brounstein type)                                                                        |
| $B_1$     | $ep$                        | Simple Prout–Tompkins equation                                                                                                 |
| $B_{na}$  | $e^n p^a$                   | Expanded Prout–Tompkins equation ( $na$ )                                                                                      |
| $C_{1-X}$ | $e(1 + K_{\text{cat}}X)$    | First-order reaction with autocatalysis through the reactants, $X$<br>$X = a$ product in the complex model, frequently $X = p$ |
| $C_{1-X}$ | $e^n(1 + K_{\text{cat}}X)$  | $n^{\text{th}}$ -order reaction with autocatalysis through the reactants, $X$                                                  |
| $A_2$     | $2e(-\ln(e))^{1/2}$         | Two-dimensional nucleation                                                                                                     |
| $A_3$     | $3e(-\ln(e))^{2/3}$         | Three-dimensional nucleation                                                                                                   |
| $A_n$     | $ne(-\ln(e))^{(n-1)/n}$     | $n$ -dimensional nucleation/nucleus growth according to Avrami–Erofeev                                                         |

Where  $A$  is the pre-exponential factor;  $E$  is the activation energy;  $R$  is the gas constant;  $T$  is the temperature;  $\alpha$  is the conversion degree;  $e$  is the starting concentration of the reactant ( $e = 1 - \alpha$ ), and  $p$  is the concentration of the final product ( $p = \alpha$ ).
